# Supplementary material for: Oral administration of silver nanomaterials affects the gut microbiota and metabolic profile altering the secretion of 5-HT in mice
Source: Royal Society of Chemistry journal article supplement (doi:10.1039/d2tb02756a), 2023-01-01
Supplement: d2tb02756a1.pdf [file d2tb02756a1.pdf]

**Oral administration of silver nanomaterials affects the gut microbiota  
and metabolic profile to alter the secretion of 5-HT in mice**

Xiaoyu Wang<sup>1,2</sup>, Xuejing Cui<sup>1,2,3\*</sup>, Janguang Wu<sup>1,2</sup>, Lin Bao<sup>1,2</sup>, Chunying Chen<sup>1,2,3\*</sup>

1. CAS Key Laboratory for Biomedical Effects of Nanomaterials and Nanosafety &

CAS Center for Excellence in Nanoscience, National Center for Nanoscience and

Technology of China, Beijing 100190, China

2. University of Chinese Academy of Sciences, Beijing 100049, China

3. The GBA National Institute for Nanotechnology Innovation, Guangdong 510700,

China

\*Corresponding author: Prof. Chunying Chen; Associate Prof. Xuejing Cui.

E-mail: [chenchy@nanoctr.cn](mailto:chenchy@nanoctr.cn); [cuiyj@nanoctr.cn](mailto:cuiyj@nanoctr.cn).

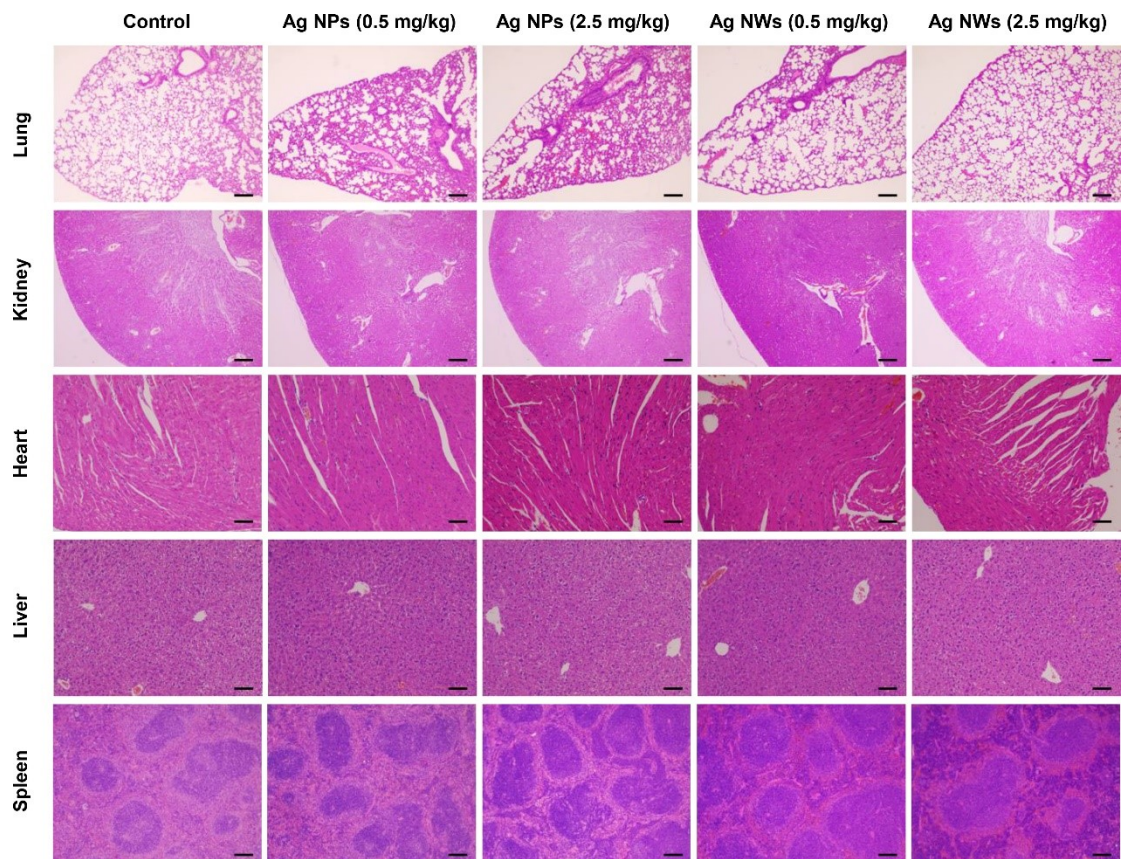

**Supplementary Fig. 1** Representative H&E staining images of tissues after oral administration of Ag NPs and Ag NWs with various dosage for 28 days. Scale bar: 500  $\mu\text{m}$ .

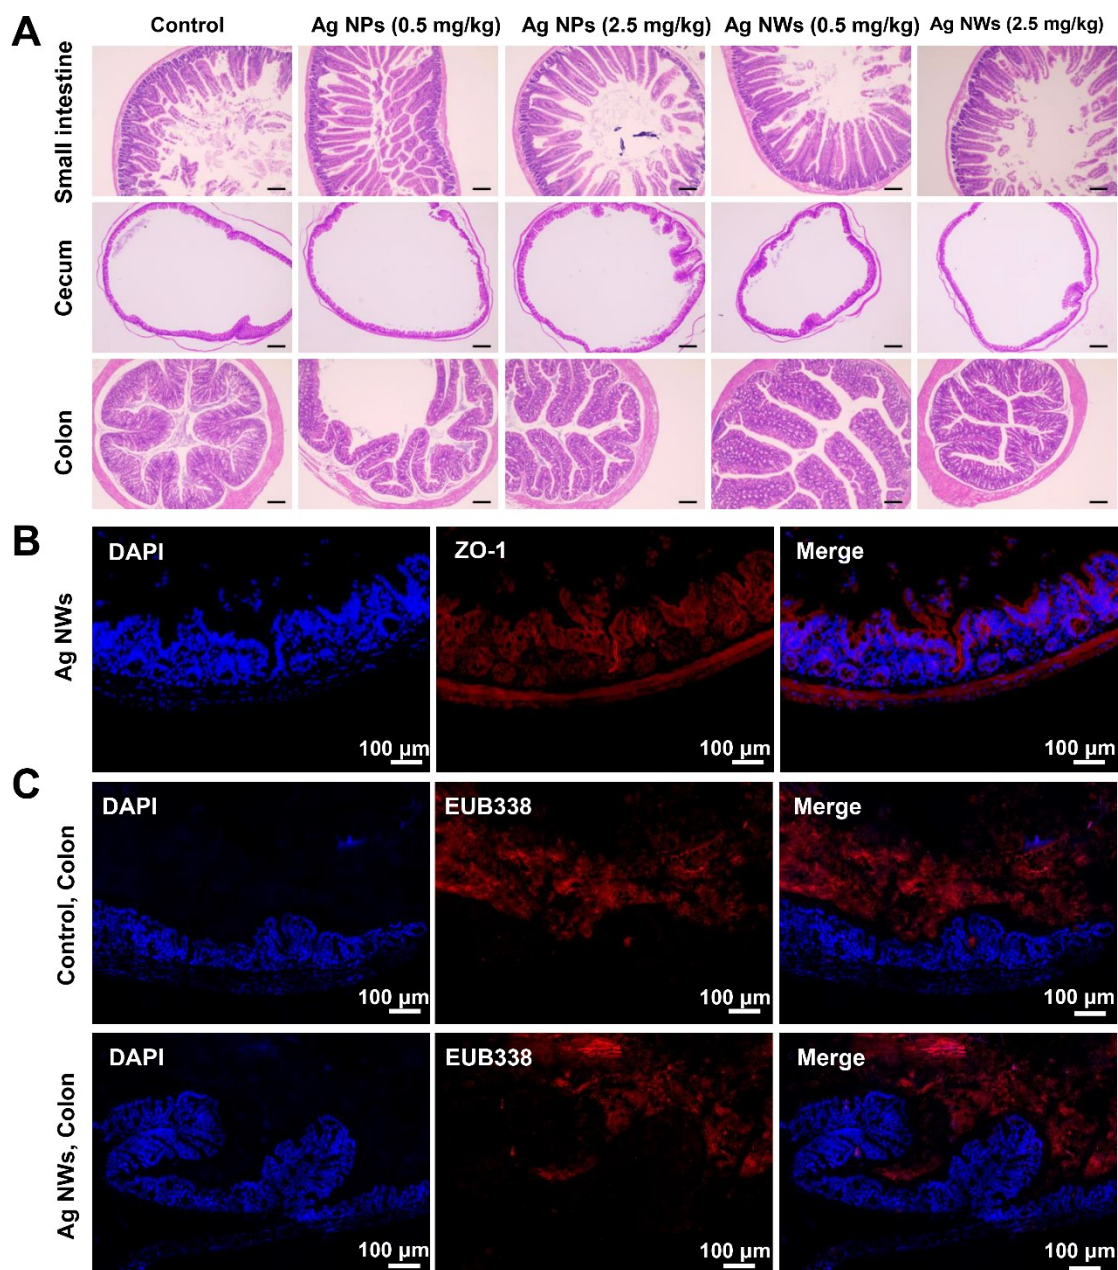

**Supplementary Fig. 2** (A) Representative H&E staining images of small intestine, cecum and colon after oral administration of Ag NPs and Ag NWs with various dosage for 28 days. Scale bar: 500  $\mu$ m. (B) Representative images of histological sections to evaluate intestinal integrity by immunofluorescence. DAPI, blue; ZO-1, red. Scale bars, 100  $\mu$ m. (C) Bacteria in the colon stained by fluorescence in situ hybridization (FISH). DAPI, blue; EUB338, red. Scale bars, 100  $\mu$ m. All data are presented as the mean  $\pm$  SEM.



**A**

- Control
- Ag NPs (0.5 mg/kg)
- Ag NPs (2.5 mg/kg)
- Ag NWs (0.5 mg/kg)
- Ag NWs (2.5 mg/kg)

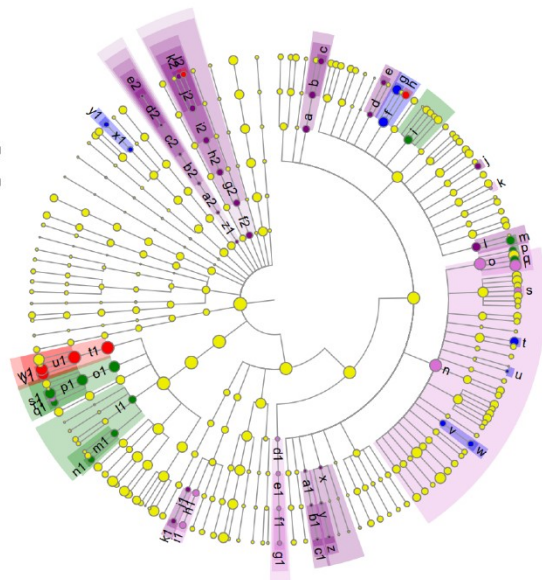

- a: f\_Clostridiales\_vadinB609\_group
- b: g\_norank\_f\_Clostridiales\_vadinB609\_group
- c: s\_unclassified\_g\_norank\_f\_Clostridiales\_vadinB609\_group
- d: g\_Ruminococcaceae\_UCG-010
- e: s\_uncultured\_organism\_g\_Ruminococcaceae\_UCG-010
- f: g\_Ruminococcaceae\_UCG-014
- g: s\_unclassified\_g\_Ruminococcaceae\_UCG-014
- h: s\_uncultured\_bacterium\_g\_Ruminococcaceae\_UCG-014
- i: g\_Anerotruncus
- j: s\_uncultured\_bacterium\_g\_Ruminococcaceae\_UCG-014
- k: s\_unclassified\_g\_Eubacterium\_coprostan
- l: g\_Ruminoclostridium\_9
- m: s\_unclassified\_g\_Ruminoclostridium\_9
- n: f\_Lachnospiraceae
- o: g\_Lachnospiraceae\_NK4A136\_group
- p: s\_Lachnospiraceae\_bacterium\_COE1
- q: s\_uncultured\_Clostridiolobus\_bacterium\_g\_Lachnospiraceae\_NK4A136\_group
- r: s\_unclassified\_g\_Lachnospiraceae\_NK4A136\_group
- s: s\_Lachnospiraceae\_bacterium\_DW8
- t: s\_unclassified\_g\_Eubacterium\_xylanophilus
- u: s\_uncultured\_bacterium\_g\_Lachnospiraceae
- v: g\_Coprococcus\_1
- w: s\_unclassified\_g\_Coprococcus\_1
- x: f\_Clostridiaceae\_1
- y: g\_Clostridium\_sensu\_stricto\_12
- z: s\_unclassified\_g\_Clostridium\_sensu\_stricto\_12
- a1: f\_Syntrophomonadaceae
- b1: g\_unclassified\_f\_Syntrophomonadaceae
- c1: s\_unclassified\_f\_Syntrophomonadaceae
- d1: o\_Thermoanaerobacteriales
- e1: f\_Thermoanaerobacteraceae
- f1: g\_Gelfia

**B**

- Control
- Ag NPs (0.5 mg/kg)
- Ag NPs (2.5 mg/kg)
- Ag NWs (0.5 mg/kg)
- Ag NWs (2.5 mg/kg)

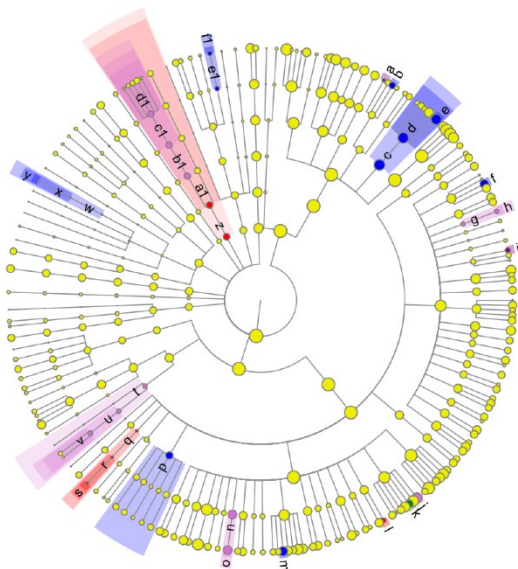

- a: s\_unclassified\_g\_Parabacteroides
- b: s\_Parabacteroides\_distasonis
- c: f\_Bacteroidaceae
- d: g\_Bacteroides
- e: s\_unclassified\_g\_Bacteroides
- f: s\_uncultured\_bacterium\_g\_Ocillobacteroides
- g: g\_Ruminococcus\_1
- h: s\_unclassified\_g\_Ruminococcus\_1
- i: s\_uncultured\_organism\_g\_Ruminococcaceae
- j: s\_uncultured\_bacterium\_g\_norank\_f\_Lachnospiraceae
- k: s\_Lachnospiraceae\_bacterium\_DW8
- l: s\_uncultured\_bacterium\_g\_Lachnospiraceae
- m: s\_Eubacterium\_plexicaudatum
- n: g\_Marvinbryantia
- o: s\_uncultured\_bacterium\_g\_Marvinbryantia
- p: f\_Family\_XIII
- q: f\_Defluviitaleaceae
- r: g\_Defluviitaleaceae\_UCG-011
- s: s\_unclassified\_g\_Defluviitaleaceae\_UCG-011
- t: o\_Bacillales
- u: f\_Staphylococcaceae
- v: g\_Staphylococcus
- w: f\_Phylobacteriaceae
- x: g\_Mesorhizobium
- y: s\_unclassified\_g\_Mesorhizobium
- z: g\_Teneriutes
- a1: o\_Molluscites
- b1: o\_Molluscites\_RF9
- c1: g\_norank\_o\_Molluscites\_RF9
- d1: g\_norank\_o\_Molluscites\_RF9
- e1: g\_Adlercreutzia
- f1: s\_uncultured\_bacterium\_g\_Adlercreutzia

**Supplementary Fig. 3** Linear discriminant analysis, Effect Size (LEfSe), was used to perform the discrimination between groups after oral exposure to Ag NPs and Ag NWs for 14 days (A) and 28 days (B).

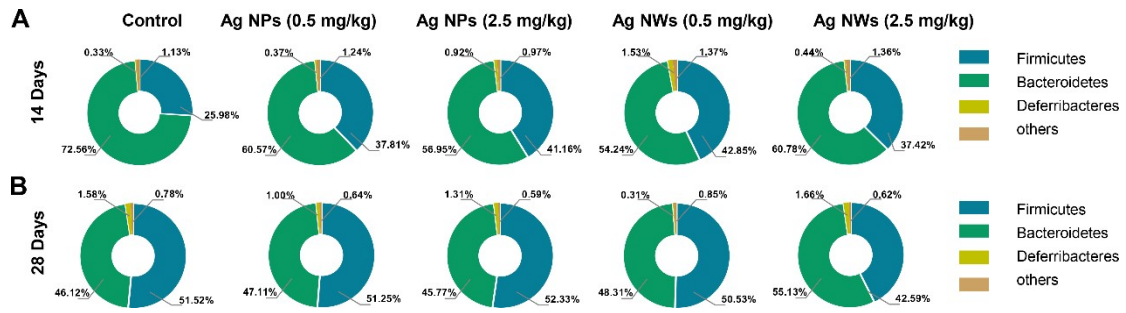

**Supplementary Fig. 4** The gut microbiota at phylum level in mice after oral exposure to Ag NPs and Ag NW for 14 days (A) and 28 days (B). *Firmicutes*: gram-positive bacteria. *Bacteroidetes*: gram-negative bacteria.
